# Supplementary material for: A highly stable Mn-based cathode with low crystallinity Li2MnO3 and spinel functional units for lithium-ion batteries
Source: Royal Society of Chemistry journal article supplement (doi:10.1039/d4eb00003j), 2025-01-01
Supplement: d4eb00003j1.pdf [file d4eb00003j1.pdf]

## Supporting Information

### **High-stable Mn-based cathode with low crystalline $\text{Li}_2\text{MnO}_3$ and spinel functional units for lithium-ion batteries**

Shiqi Liu<sup>‡a,b,f</sup>, Yinzhong Wang<sup>‡a,b,c</sup>, Dongdong Xiao<sup>‡c</sup>, Haifeng Li<sup>a,b</sup>, Tianhao Wu<sup>a,b</sup>, Boya Wang<sup>a,b</sup>, Guangxing Hu<sup>a,b</sup>, Lingqiao Wu<sup>a,b</sup>, Yulong Wang<sup>a,b</sup>, Guoqing Wang<sup>a,b,c</sup>, Nian Zhang<sup>d</sup> and Haijun Yu<sup>a,b,f,\*</sup>

<sup>a</sup>Institute of Advanced Battery Materials and Devices, College of Materials Science and Engineering, Beijing University of Technology, Beijing 100124, China. E-mail: hj-yu@bjut.edu.cn

<sup>b</sup>Key Laboratory of Advanced Functional Materials, Ministry of Education, Beijing University of Technology, Beijing 100124, China.

<sup>c</sup>Beijing National Laboratory for Condensed Matter Physics, Institute of Physics, Chinese Academy of Sciences, Beijing 100190, China.

<sup>d</sup>State Key Laboratory of Functional Materials for Informatics, Shanghai Institute of Microsystem and Information Technology, Chinese Academy of Sciences, Shanghai 200050, People's Republic of China.

<sup>e</sup>Beijing Create Energy & Benefit Future Co., Ltd., Beijing 100176, China.

<sup>f</sup>Institute of Matter Science, Beijing University of Technology, Beijing 100124, China.

<sup>‡</sup>These authors contributed equally to this work.

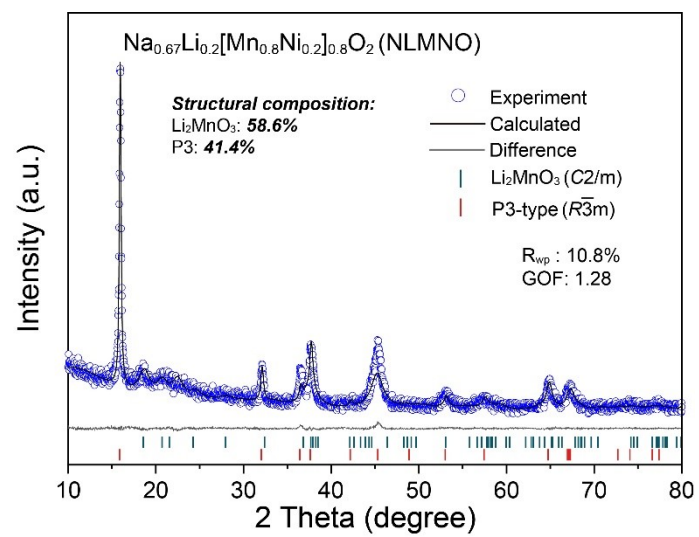

**Figure S1.** XRD refinement of NLMNO.

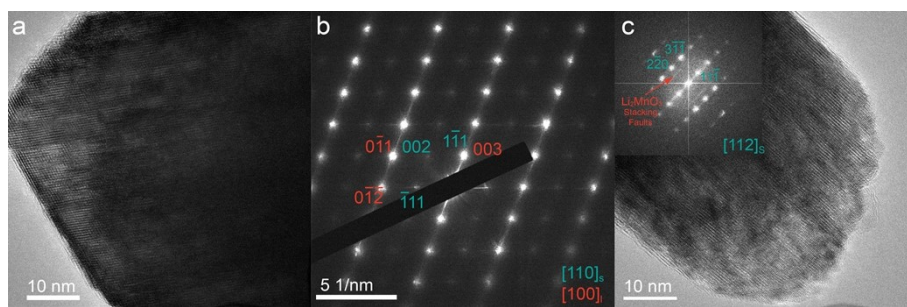

**Figure S2.** TEM images and corresponding SAED and FFT patterns of PHS-LLMNO within different particles.

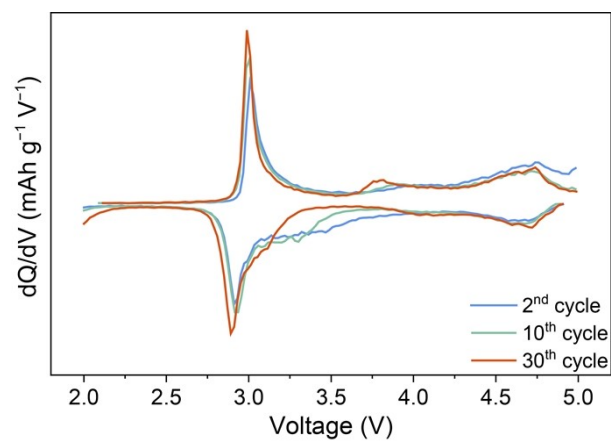

**Figure S3.** The  $dQ/dV$  curves of PHS-LLMNO in different cycles at  $10 \text{ mA g}^{-1}$ .

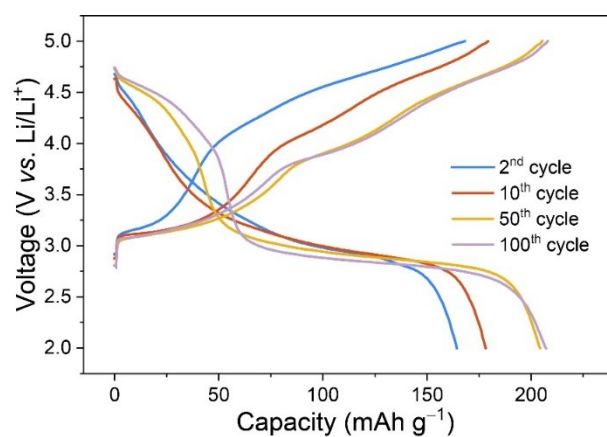

**Figure S4.** Charge/discharge profiles of PHS-LLMNO in different cycles at 200 mA g<sup>-1</sup>.

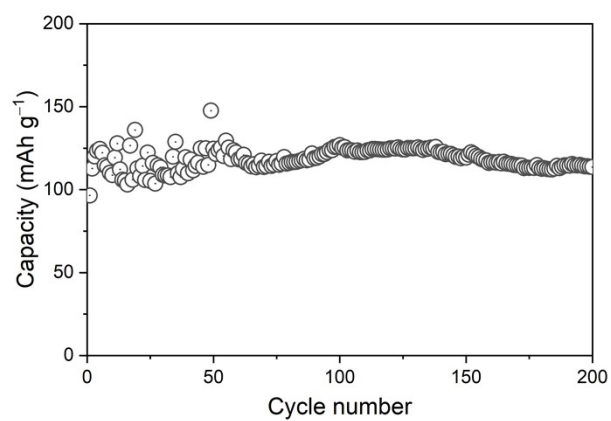

**Figure S5.** The capacity retention of PHS-LLMNO with the high mass loading of active material of  $6.5 \text{ mg cm}^{-2}$  at  $600 \text{ mA g}^{-1}$ .

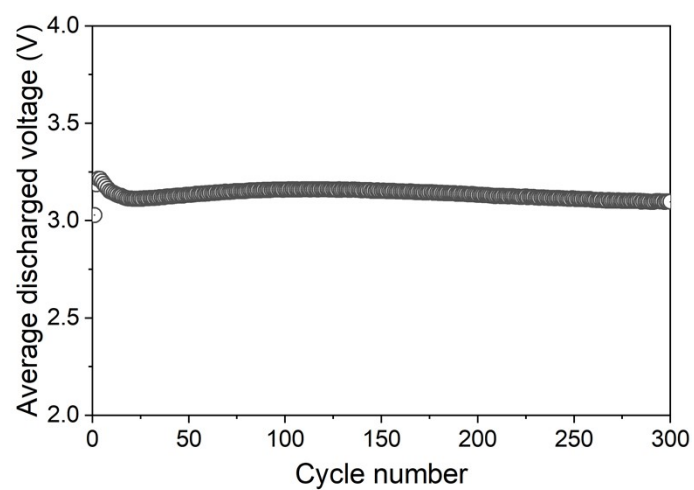

**Figure S6.** The variation of average discharged voltage versus cycle number at 300 mA  $\text{g}^{-1}$ .

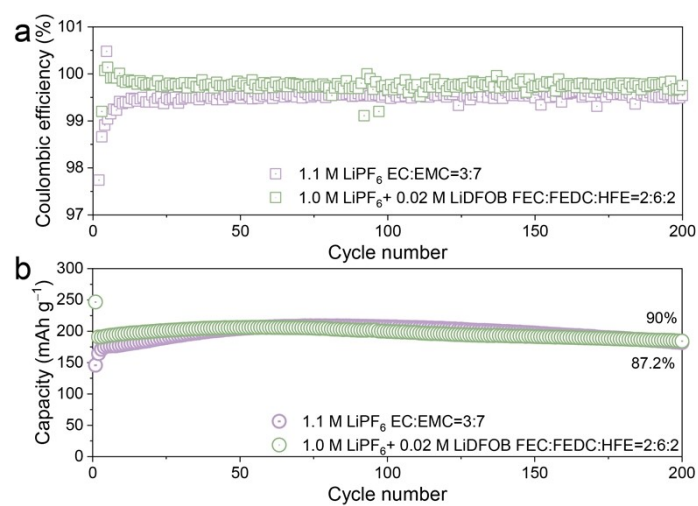

**Figure S7.** (a) Coulombic efficiency and (b) capacity retention of PHS-LLMNO in different electrolytes at 200 mA g<sup>-1</sup>.

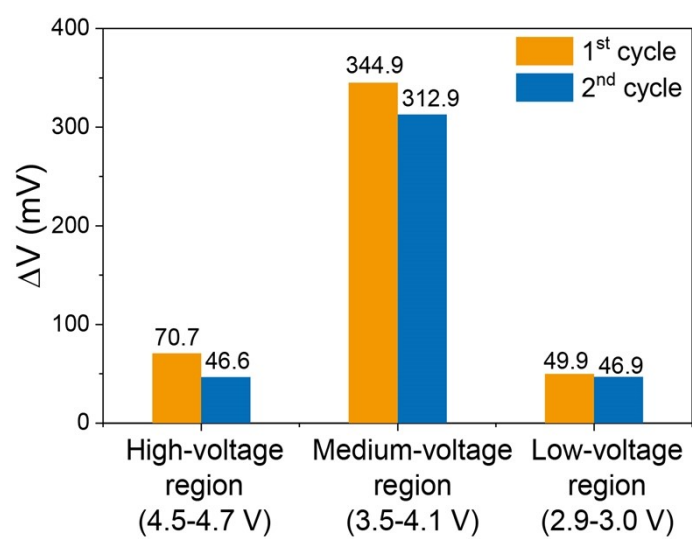

**Figure S8.** The calculated overpotentials at selected voltage regions upon the discharge processes of the initial two cycles under GITT measurement.

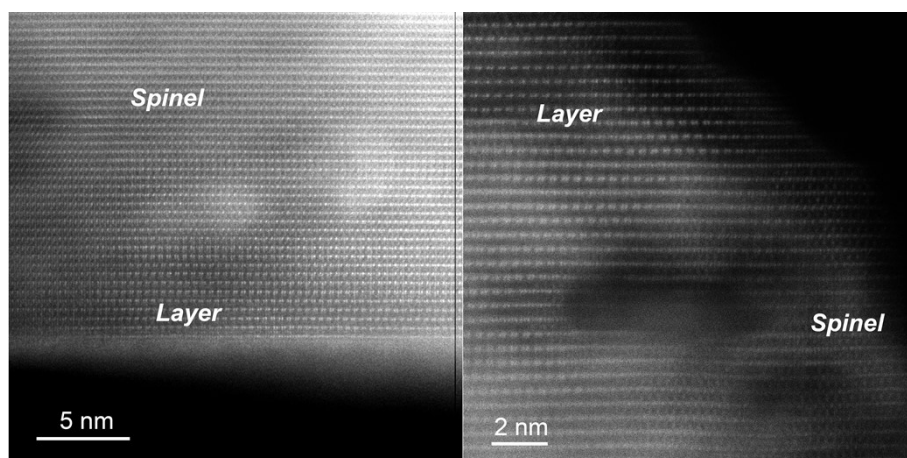

**Figure S9.** HAADF-STEM images of PHS-LLMNO in different particles and areas.

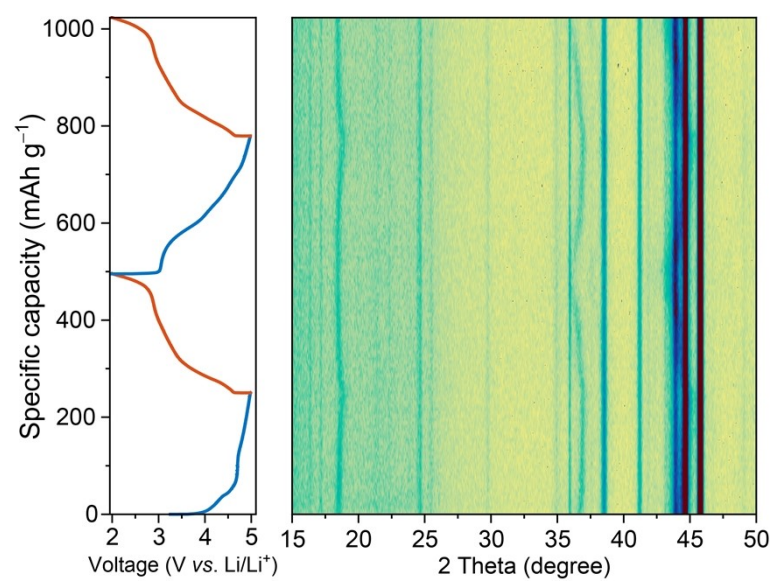

**Figure S10.** The *in situ* XRD 2D contour image and corresponding charge/discharge profiles of PHS-LLMNO.

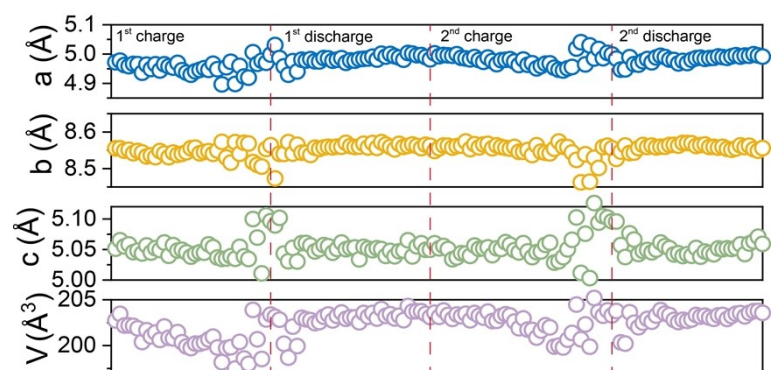

**Figure S11.** Variation of cell parameters  $a$ ,  $b$ ,  $c$  and  $V$  in the initial two cycles of PHS-LLMNO, respectively.

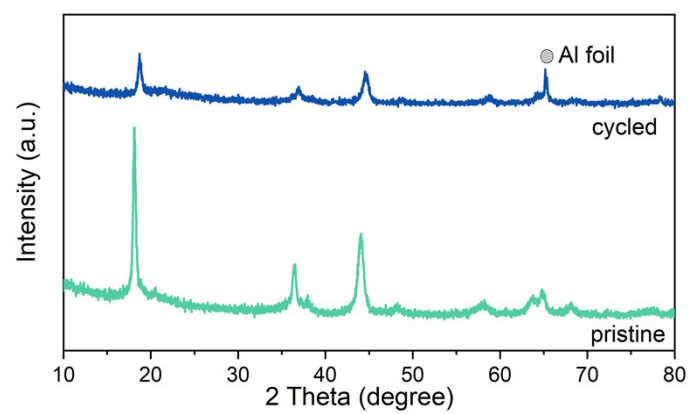

**Figure S12.** XRD pattern of PHS-LLMNO cathode before and after cycling.

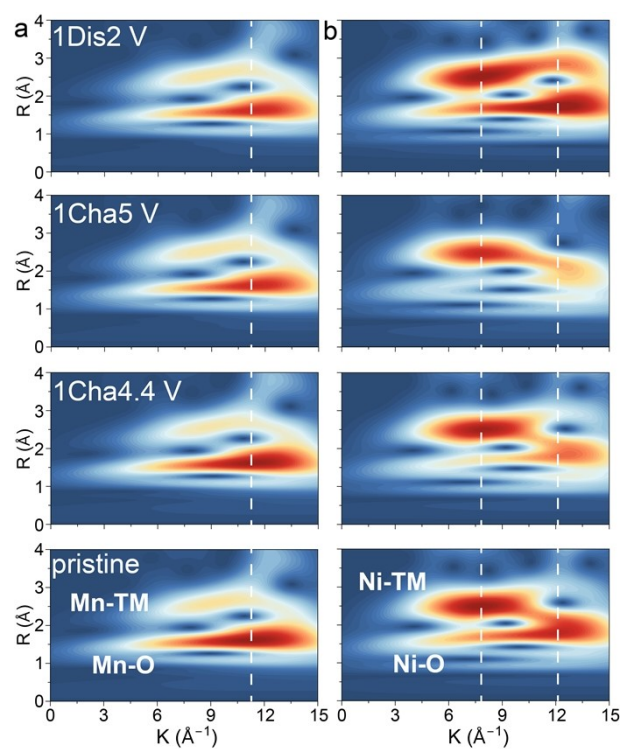

**Figure S13.** Wavelet transforms of (a) Mn *K*-edge and (b) Ni *K*-edge EXAFS spectra in PHS-LLMNO at different electrochemical states.

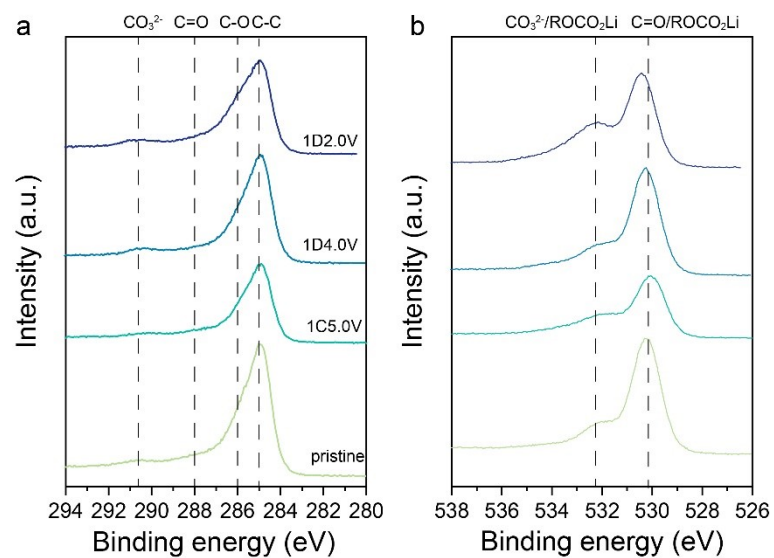

**Figure S14.** The ex situ XPS (a) C1s and (b) F1s spectra of PHS-LLMNO at the pristine, charged to 5.0 V, discharged to 4.0 V and discharged to 2.0 V, respectively.

**Table S1.** Stoichiometry from Inductively coupled plasma (ICP) results of PHS-LLMNO.

| Elements | content (mg/L) | molar ratio |
|----------|----------------|-------------|
| Li       | 11.9           | 0.80        |
| Mn       | 75.1           | 0.64        |
| Ni       | 20.3           | 0.16        |

**Table S2.** XRD refinement results of PHS-LLMNO based on two-phase model of monoclinic  $C2/m$  space group of  $\text{Li}_2\text{MnO}_3$  and cubic  $P4_332$  space group of  $\text{LiMn}_{1.5}\text{Ni}_{0.5}\text{O}_4$ .

| Site                                                                                                                                                               | Wyckoff position | $x$      | $y$      | $z$      |
|--------------------------------------------------------------------------------------------------------------------------------------------------------------------|------------------|----------|----------|----------|
| Mn1                                                                                                                                                                | 4g               | 0        | 0.172(3) | 0        |
| Li1                                                                                                                                                                | 4g               | 0        | 0.172(3) | 0        |
| Li2                                                                                                                                                                | 2b               | 0        | 0.5      | 0        |
| Mn2                                                                                                                                                                | 2b               | 0        | 0.5      | 0        |
| Li3                                                                                                                                                                | 2c               | 0        | 0        | 0.5      |
| Li4                                                                                                                                                                | 4h               | 0        | 0.69120  | 0.5      |
| O1                                                                                                                                                                 | 4i               | 0.240(1) | 0        | 0.246(1) |
| O2                                                                                                                                                                 | 8j               | 0.249(6) | 0.336(5) | 0.221(5) |
| Phase $\text{Li}_2\text{MnO}_3$ , $a=4.953(5)$ Å; $b=8.589(9)$ Å; $c=5.067(2)$ Å; $\beta=109.640(1)^\circ$ ; $V = 203.06(8)$ Å <sup>3</sup> , fraction: 69.16(3) % |                  |          |          |          |
| Site                                                                                                                                                               | Wyckoff position | $x$      | $y$      | $z$      |
| Li                                                                                                                                                                 | 8c               | 0.00373  | 0.00373  | 0.00373  |
| Mn                                                                                                                                                                 | 12b              | 0.12118  | 0.12882  | 0.62500  |
| Ni                                                                                                                                                                 | 4b               | 0.12500  | 0.87500  | 0.37500  |
| O1                                                                                                                                                                 | 24e              | 0.195(5) | 0.004(8) | 0.002(7) |
| O2                                                                                                                                                                 | 8c               | 0.11553  | 0.61553  | 0.88447  |
| Phase $\text{LiMn}_{1.5}\text{Ni}_{0.5}\text{O}_4$ , $a = 8.162(8)$ Å; $V = 543.738(2)$ Å <sup>3</sup> , fraction: 30.84(1) %                                      |                  |          |          |          |
